# Supplementary material for: A Novel Form of Renal Tubular Acidosis Associated With Immune Checkpoint Inhibitors
Source: PubMed Central journal article supplement — Kidney Int Rep. 2022 Oct 26;8(1):197–201. doi: 10.1016/j.ekir.2022.10.019 (PMC9831939; doi:10.1016/j.ekir.2022.10.019), 2022-10-26
Supplement: mmc1.pdf [file mmc1.pdf]

## Supplemental Citations

- S1. Uribarri J, Oh MS. The Urine Anion Gap: Common Misconceptions. *J Am Soc Nephrol* 2021; 32:1025-1028.
- S2. Han KH, Croker BP, Clapp WL, et al. Expression of the ammonia transporter, rh C glycoprotein, in normal and neoplastic human kidney. *J Am Soc Nephrol* 2006; 17:2670-2679.
- S3. Lee HW, Verlander JW, Shull GE, et al. Acid-base effects of combined renal deletion of NBCe1-A and NBCe1-B. *Am J Physiol Renal* 2022; 322:F208-F224.
- S4. Lee HW, Harris AN, Romero MF, et al. NBCe1-A is required for the renal ammonia and K(+) response to hypokalemia. *Am J Physiol Renal* 2020; 318:F402-F421.
- S5. Lee HW, Verlander JW, Handlogten ME, et al. Effect of collecting duct-specific deletion of both Rh B Glycoprotein (Rhbg) and Rh C Glycoprotein (Rhcg) on renal response to metabolic acidosis. *Am J Physiol Renal* 2014; 306:F389-400.
- S6. Lee HW, Verlander JW, Bishop JM, et al. Effect of intercalated cell-specific Rh C glycoprotein deletion on basal and metabolic acidosis-stimulated renal ammonia excretion. *Am J Physiol Renal* 2010; 299:F369-379.
- S7. Bishop JM, Verlander JW, Lee HW, et al. Role of the Rhesus glycoprotein, Rh B glycoprotein, in renal ammonia excretion. *Am J Physiol Renal* 2010; 299:F1065-1077.
- S8. Lee HW, Verlander JW, Bishop JM, et al. Collecting duct-specific Rh C glycoprotein deletion alters basal and acidosis-stimulated renal ammonia excretion. *Am J Physiol Renal* 2009; 296:F1364-1375.
- S9. Atiq SO, Gokhale T, Atiq Z, et al. A Case of Pembrolizumab Induced Distal Renal Tubular Acidosis. *Journal of General Internal Medicine* 2021; 36:S299-S300.

- S10. El Bitar S, Weerasinghe C, El-Charabaty E, et al. Renal Tubular Acidosis an Adverse Effect of PD-1 Inhibitor Immunotherapy. *Case Rep Oncol Med* 2018; 2018:8408015.
- S11. Herrmann SM, Alexander MP, Romero MF, et al. Renal Tubular Acidosis and Immune Checkpoint Inhibitor Therapy: An Immune-Related Adverse Event of PD-1 Inhibitor- A Report of 3 Cases. *Kidney Med* 2020; 2:657-662.
- S12. Rashidi A, Herlitz L, Tariq H. Renal tubular acidosis and acute kidney injury secondary to cemiplimab. *Journal of Onco-Nephrology* 2021; 5:136-139.
- S13. Charmetant X, Teuma C, Lake J, et al. A new expression of immune checkpoint inhibitors' renal toxicity: when distal tubular acidosis precedes creatinine elevation. *Clin Kidney J* 2020; 13:42-45.
- S14. Ding H, Wu X, Gao W. PD-L1 is expressed by human renal tubular epithelial cells and suppresses T cell cytokine synthesis. *Clin Immunol* 2005; 115:184-191.
